# Supplementary material
Source: PubMed Central journal article supplement (PMC3699902)
Supplement: Supp_Fig1.pdf [file Supp_Fig1.pdf]

## Supplementary Data

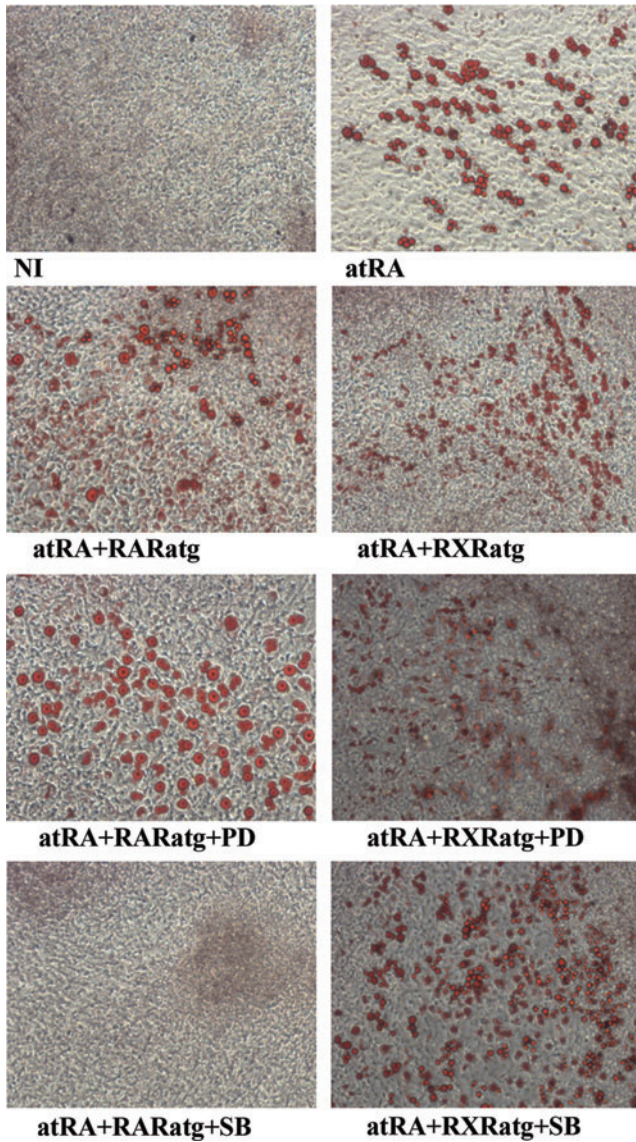

**SUPPLEMENTARY FIG. S1.** Oil-Red-O micrographs of cultures treated with combinations of atRA, RAR/RXRatg, and MAPK inhibitors. Analysis was done as indicated in the legend to Figs. 3 and 6. Micrograph specimens are shown here, and statistical results are presented in Fig. 7A. PD, PD98059; SB, SB203580. atRA, all-*trans*-retinoic acid; RAR, retinoid acid receptors; RXR, retinoid-X receptors; MAPK, mitogen-activated protein kinases.
