# Supplementary material
Source: PubMed Central journal article supplement (PMC3699902)
Supplement: Supp_Fig2.pdf [file Supp_Fig2.pdf]

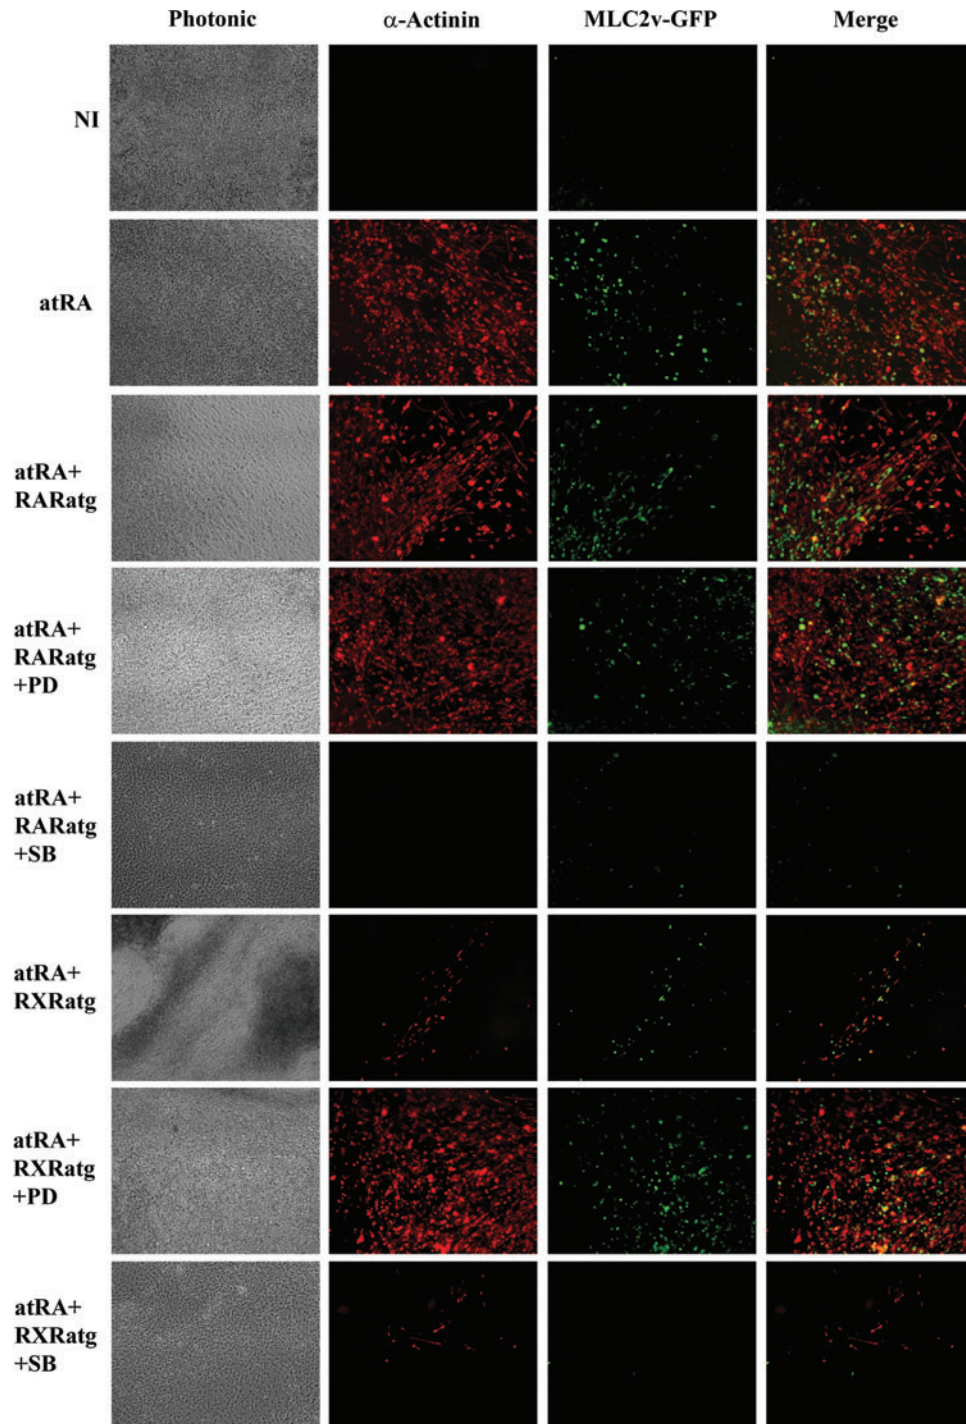

**SUPPLEMENTARY FIG. S2.** Fluorescence micrographs of myomarkers in cultures treated with combinations of atRA, RAR/RXRatg, and MAPK inhibitors. Analysis was done as indicated in the legend to Figs. 4 and 6. Micrograph specimens are shown here, and statistical results are presented in Fig. 7B. PD, PD98059; SB, SB203580.
