# Supplementary material
Source: PubMed Central journal article supplement (PMC3699902)
Supplement: Supp_Fig3.pdf [file Supp_Fig3.pdf]

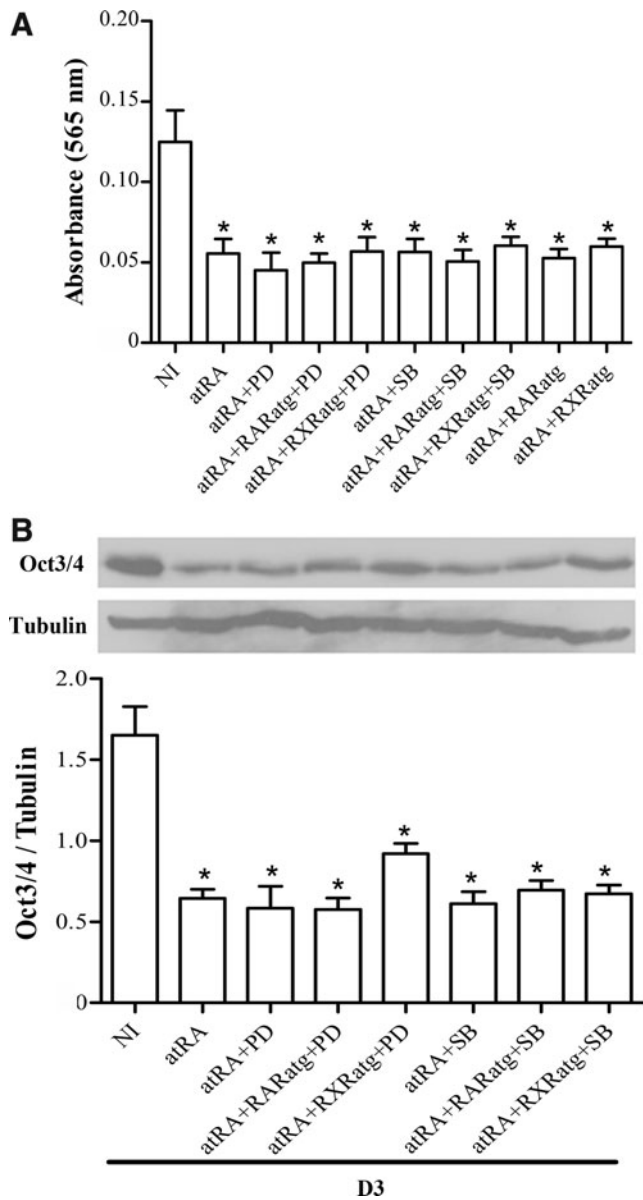

**SUPPLEMENTARY FIG. S3.** Cell proliferation (**A**) and Oct3/4 protein expression (**B**) in cultures treated with combinations of atRA, RAR/RXRatg, and MAPK inhibitors. Analysis was done as indicated in the legend to Fig. 2. Values are expressed as the means  $\pm$  SEM of three independent cell series, and \*indicates a significant difference compared with the NI condition ( $P < 0.05$ ).
