# Supplementary material
Source: PubMed Central journal article supplement (PMC3699902)
Supplement: Supp_Table1.pdf [file Supp_Table1.pdf]

SUPPLEMENTARY TABLE S1. PRIMERS AND QUANTITATIVE POLYMERASE CHAIN REACTION CONDITIONS

| <i>Primer name</i> | <i>Primer sense (S) and antisense (AS) sequences</i>  | <i>Temperature of annealing (°C)</i> | <i>Product size (bp)</i> | <i>Reference or accession number</i> |
|--------------------|-------------------------------------------------------|--------------------------------------|--------------------------|--------------------------------------|
| $\beta$ -Actin     | S: gccctggctcctagcacc<br>AS: ccaccaatccacacagagtactgg | 60                                   | 74                       | 1                                    |
| GAPDH              | S: cgacccttcattgacctcaac<br>AS: ctccagacatactcagcacc  | 55                                   | 190                      | 2                                    |
| LPL                | S: aactgccacttcaaccacagca<br>AS: ataatggtgctggcccgat  | 60                                   | 168                      | NM_008509                            |
| PPAR $\gamma$      | S: ccagagtctgctgatctgcg<br>AS: gccacctctttgctctgctc   | 55                                   | 217                      | 3                                    |

GAPDH, glyceraldehyde 3-phosphate dehydrogenase; LPL, lipoprotein lipase; PPAR $\gamma$ , peroxisome proliferator-activated receptor- $\gamma$ .

1. Krook H, A Hagberg, Z Song, U Landegren, L Wennberg and O Korsgren. (2002). A distinct Th1 immune response precedes the described Th2 response in islet xenograft rejection. *Diabetes* 51:79–86.
2. Liu H, TM Harris, HH Kim and G Childs. (2005). Cardiac myocyte differentiation: the Nkx2.5 and Cripto target genes in P19 clone 6 cells. *Funct Integr Genomics* 5:218–239.
3. Fujita T, S Furukawa, K Morita, T Ishihara, M Shiotani, Y Matsushita, M Matsuda and I Shimomura. (2005). Glucosamine induces lipid accumulation and adipogenic change in C2C12 myoblasts. *Biochem Biophys Res Commun* 328:369–374.
