# Supplementary material
Source: PubMed Central journal article supplement (PMC3699902)
Supplement: Supp_Table2.pdf [file Supp_Table2.pdf]

SUPPLEMENTARY TABLE S2. SUMMARY OF MESODERMAL YIELDS

| <i>Treatment</i> | <i>Agents</i>        | <i>Likely impact on RAR/RXR</i> | <i>Mesodermal yields</i> |                  |           |
|------------------|----------------------|---------------------------------|--------------------------|------------------|-----------|
|                  |                      |                                 | <i>Adipo</i>             | <i>Total Myo</i> | <i>CM</i> |
| 1                | NI                   |                                 | 0                        | 0                | 0         |
| 2                | atRA                 | RARa + RXRa                     | ++                       | ++               | ++        |
| 3                | TTNPB                | RARa > RXRa                     | +++                      | 0                | 0         |
| 4                | atRA + RXRatg        | RARa (RXR availability ↓)       | ++                       | +                | +         |
| 5                | LG268                | RXRa > RARa                     | ++                       | ++               | ++        |
| 6                | atRA + RARatg        | RXRa (RAR availability ↓)       | ++                       | ++               | ++ / +    |
| 7                | atRA + ERKi          | RARa + RXRa                     | ++                       | +++              | +++       |
| 8                | atRA + RXRatg + ERKi | RARa (RXR availability ↓)       | ++                       | ++               | ++        |
| 9                | atRA + RARatg + ERKi | RXRa (RAR availability ↓)       | ++                       | ++               | ++ / +    |
| 10               | atRA + p38i          | RARa + RXRa                     | +++                      | +++              | ++        |
| 11               | atRA + RXRatg + p38i | RARa (RXR availability ↓)       | ++                       | 0                | 0         |
| 12               | atRA + RARatg + p38i | RXRa (RAR availability ↓)       | 0                        | 0                | 0         |

Mesodermal yields of all treatments are compared with atRA treatment (Treatment 2). Increased yields have an additional + sign, whereas decreased yields loss a + sign, and the symbol 0 is for the absence or great rarity of cells of the indicated phenotype. Adipocyte (Adipo) yields are based on Oil-Red-O staining, SKM+CM (total Myo) yields on  $\alpha$ -actinin signal, and CM yields on MLC2v-GFP signal. RARa or RXRa, RAR or RXR activity; ERKi or p38i, inhibitor of ERK or p38 signaling.
